# Supplementary material
Source: PubMed Central journal article supplement (PMC3133341)
Supplement: supp_193_14_3606__1.pdf [file supp_193_14_3606__1.pdf]

**Phenazine-1-carboxylic acid promotes bacterial biofilm development  
via ferrous iron acquisition**

Yun Wang<sup>1,3\*</sup>, Jessica C. Wilks<sup>1</sup>, Thomas Danhorn<sup>1,3</sup>, Itzel Ramos<sup>1,3</sup>, Laura Croal<sup>1</sup>, and  
Dianne K. Newman<sup>1,2,3\*</sup>

<sup>1</sup>Department of Biology, <sup>2</sup>Department of Earth, Atmospheric and Planetary Sciences,

<sup>3</sup>Howard Hughes Medical Institute, Massachusetts Institute of Technology, 77

Massachusetts Avenue, Cambridge, MA 02139

**Supplemental Figure**

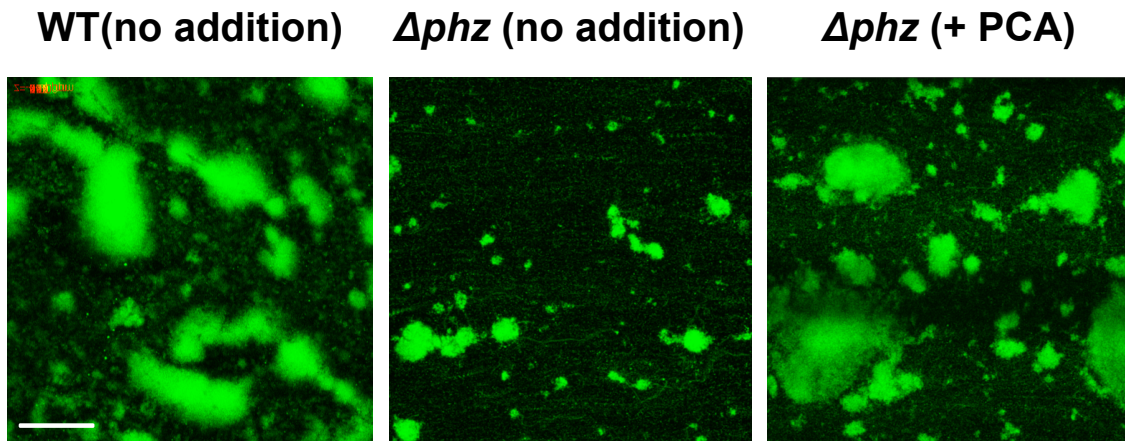

**Fig. S1.** PCA can rescue the biofilm defect of the *P. aeruginosa* PA14 phenazine-null strain ( $\Delta phz$ ), resulting in a biomass similar to the wild type (WT). Confocal microscopic images of YFP-labeled PA14 WT and  $\Delta phz$  strains incubated in biofilm flow cells at 22 °C for 6 days with no addition (for both strains), or with addition of 10  $\mu$ M PCA (for  $\Delta phz$ ), to 1% TSB medium. Images are top-down views (x-y plane); scale bar: 100  $\mu$ m. Results are representative of 4 experiments.
